# Supplementary material for: Artificial Intelligence Assisted Ultrasonic Extraction of Total Flavonoids from Rosa sterilis
Source: MDPI journal article supplement (doi:10.3390/molecules26133835), 2021-06-23
Supplement: s1 [file s1]

# Supplementary material

## Artificial intelligence assisted ultrasonic extraction of total flavonoids from *Rosa sterilis*

Jing Liu <sup>1,2</sup>, Chaochan Li <sup>2,\*</sup>, Guijie Ding <sup>3,\*</sup> and Wenxuan Quan <sup>2</sup>

<sup>1</sup> Key Laboratory of Plant Physiology and Developmental Regulation of Guizhou Province, College of Life Sciences, Guizhou Normal University, Guiyang 550025, China. L2876395771@163.com

<sup>2</sup> Guizhou Provincial Key Laboratory for Information Systems of Mountainous Areas and Protection of Ecological Environment, Guizhou Normal University, Guiyang 550001, China. chaochanl@gznu.edu.cn; wenxuanq@gznu.edu.cn

<sup>3</sup> Institute for Forest Resources and Environment of Guizhou, Key Laboratory of Forest Cultivation in Plateau Mountain of Guizhou Province, Guizhou University, Guiyang 550025, China. gjdinggz@126.com

\* Correspondence: chaochanl@gznu.edu.cn; gjdinggz@126.com

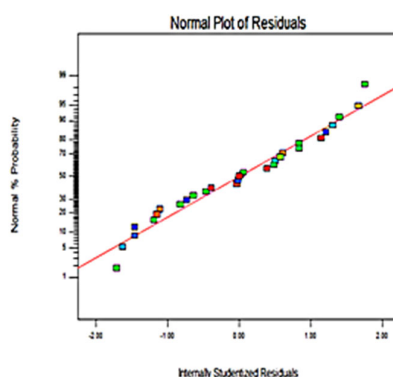

Figure S1. The normal probabilities versus internally studentized residuals.

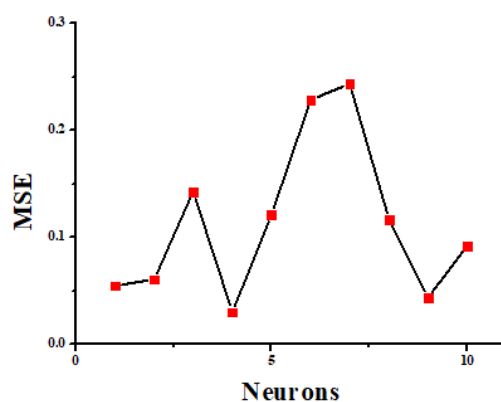

Figure S2. Mean square error (MSE) of neurons in the BP-ANN model.

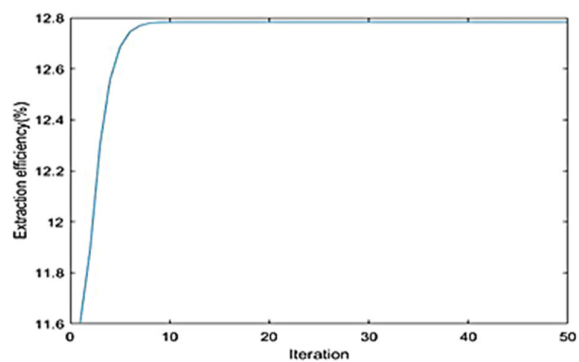

Figure S3. Extraction efficiency versus iteration.

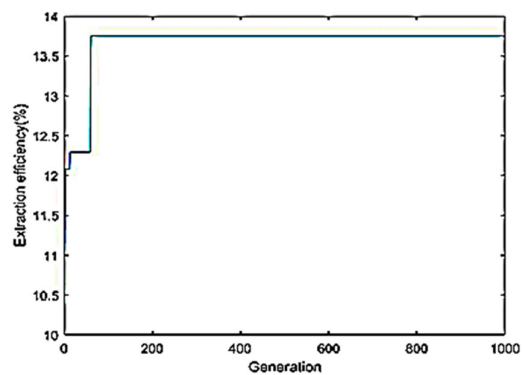

Figure S4. Decontamination efficiency versus generation.

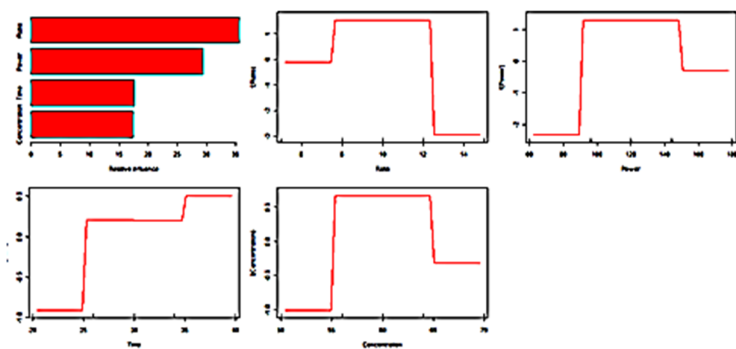

Figure S5. Importance ranking of single factor in GBRT.

Table S1. Relative influence of input variables.

| Variables             | Relative Significance (%) | Order |
|-----------------------|---------------------------|-------|
| Extraction time       | 23.64%                    | 3     |
| Ethanol concentration | 5.71%                     | 4     |
| Material liquid ratio | 78.15%                    | 1     |
| Extraction power      | 48.43%                    | 2     |

**Table S2.** Relative influence of variables.

| Variables             | Relative Significance (%) | Order |
|-----------------------|---------------------------|-------|
| Extraction time       | 28.57%                    | 4     |
| Ethanol concentration | 30.49%                    | 3     |
| Material liquid ratio | 45.03%                    | 1     |
| Extraction power      | 36.43%                    | 2     |

**Table S3.** The relative importance of GBRT.

| Input variables       | Relative significance (%) | Order |
|-----------------------|---------------------------|-------|
| Extraction time       | 17.65561%                 | 3     |
| Ethanol concentration | 17.39120%                 | 4     |
| Material liquid ratio | 35.58806%                 | 1     |
| Extraction power      | 29.36513%                 | 2     |

**Table S4.** The relative importance of Garson formula.

| Input variables       | Relative significance (%) | Order |
|-----------------------|---------------------------|-------|
| Extraction time       | 12.99%                    | 3     |
| Ethanol concentration | 20.89%                    | 4     |
| Material liquid ratio | 31.53%                    | 2     |
| Extraction power      | 34.60%                    | 1     |

**Table S5.** Extraction efficiency of flavonoids under different extraction time.

| Extraction time (min) | $\ln[C_{\infty}/(C_{\infty}-C)]$ |
|-----------------------|----------------------------------|
| 60                    | 0.214                            |
| 70                    | 0.327                            |
| 80                    | 0.419                            |
| 90                    | 0.655                            |
| 100                   | 0.736                            |
